## CORRESPONDENCE

## Reference

1. Hostetter TH, Brenner BM: Tubulointerstitial diseases of the kidney, Harrison's Principles of Internal Medicine, 13th ed. Edited

Anesthesiology  
1998; 88:275  
© 1998 American Society of Anesthesiologists, Inc.  
Lippincott-Raven Publishers

## The Practice of Using Sevoflurane Inhalation Induction for Emergency Cesarean Section and a Parturient with No Intravenous Access

*To the Editor:*—Schaut *et al.*<sup>1</sup> described a successful mask inhalation induction for emergency cesarean section in a patient without intravenous access. The authors acknowledged the limitations associated with two other anesthetic options for this challenging scenario: local infiltration by the obstetrician and intramuscular rapid sequence induction. A third alternative in this situation is an awake intubation under topical anesthesia followed by inhalation induction. Although this method requires some time and patient cooperation, securing the airway before induction of anesthesia affords an element of safety lacking in a mask inhalation induction.<sup>2</sup> Less optimal, alternative approaches include a single shot spinal anesthetic (in the case of a prolapsed umbilical cord, performed with the patient in the lateral decubitus position) with simultaneous intramuscular ephedrine, or perseverance in securing peripheral or central venous access before induction. Although all of the previously mentioned approaches have significant limitations, one should at least acknowledge that a variety of options exist.

Anesthesiology  
1998; 88:275-6  
© 1998 American Society of Anesthesiologists, Inc.  
Lippincott-Raven Publishers

*To the Editor:*—We read with interest the case report by Dr Schaut *et al.*, on sevoflurane inhalational induction for emergency cesarean section in a parturient with no intravenous access (ANESTHESIOLOGY 1997; 86:1392-4). The authors did not address two important concerns in their case report: implications of commencement of surgery in absence of intravenous access, and medical issues.

Cesarean section is not a benign procedure and can be associated with life-threatening complications such as uterine atony hemorrhage, hypotension, amniotic fluid embolism, air embolism, disseminated intravascular coagulation, uterine tears, and so on. These could lead to disastrous consequences in absence of an intravenous access. Baby delivery before intravenous access, therefore, may impose additional risks to risks already associated with mask anesthesia. Although the relative incidence of each of these complications is low, the combined risk of mask anesthesia

by Isselbacher KJ, Braunwald E, Wilson JD, Martin JB, Fauci AS, Kasper DL. New York, McGraw-Hill Inc., 1994, pp 1314-9

(Accepted for publication September 10, 1997.)

### Jerome M. Klafta, M.D.

Assistant Professor of Anesthesia and Critical Care  
University of Chicago, MC 4028  
5841 S. Maryland Avenue  
Chicago, Illinois 60637

## References

1. Schaut DJ, Khona R, Gross JB: Sevoflurane inhalation induction for emergency cesarean section in a parturient with no intravenous access. ANESTHESIOLOGY 1997; 86:1392-4
2. Cooper SD, Benumof JL, Reisner LS: The difficult airway: Risk, prophylaxis, and management, Obstetric Anesthesia Principles and Practice, 1st Edition. St. Louis, Mosby Yearbook, 1994, pp 577-605

(Accepted for publication September 10, 1997.)

and surgery without an intravenous access should not be disregarded. This raises an important question of whether the obstetricians were justified to put intense pressure on the anesthesiologists as described by authors. There appeared to be no time to discuss the additional risks involved with a technique deviating from standard of care with the patient or the husband.

During cesarean section, the risk-to-benefit ratio implies risk to the mother *versus* benefit to the baby. The primary responsibility of the anesthesiologist and the obstetrician is directed toward the safety of the mother. We congratulate the authors for producing a successful outcome. One favorable outcome, however, does not imply that the anesthetic approach is justified, safe, or advisable. If this mother had suffered some sort of catastrophe resulting from lack of intravenous access, it would be hard to defend the technique as performed here. Publication of this case report should not imply advocacy of this technique in similar circumstances, nor
